# Supplementary material for: Structural basis for Retriever-SNX17 assembly and endosomal sorting
Source: PubMed Central journal article supplement — bioRxiv. 2024 Mar 13:2024.03.12.584676. Preprint. [Version 1] doi: 10.1101/2024.03.12.584676 (PMC10980035; doi:10.1101/2024.03.12.584676), 2024-03-13
Supplement: NIHPP2024.03.12.584676v1-supplement-1.pdf [file NIHPP2024.03.12.584676v1-supplement-1.pdf]

## Supplementary Table 1: DNA constructs used in this study.

| Name                                   | Description                                                                                                       | Source/reference                                                                                                                                                                   | Identifier                                                                                                                     |
|----------------------------------------|-------------------------------------------------------------------------------------------------------------------|------------------------------------------------------------------------------------------------------------------------------------------------------------------------------------|--------------------------------------------------------------------------------------------------------------------------------|
| <b>Recombinant Protein preparation</b> |                                                                                                                   |                                                                                                                                                                                    |                                                                                                                                |
| pAV5a empty vector                     | pAV5a empty vector for insect cell expression                                                                     | Published <sup>1</sup>                                                                                                                                                             | pAV5a                                                                                                                          |
| pMalC2Tev empty vector                 | pMalC2Tev empty vector for bacterial expression of MBP-Tev-tagged proteins                                        | Published <sup>1</sup>                                                                                                                                                             | pMalTev                                                                                                                        |
| pGexTev empty vector                   | pGexTev empty vector for bacterial expression of GST-Tev-tagged proteins                                          | Published <sup>1</sup>                                                                                                                                                             | pGexTev                                                                                                                        |
| VPS35L                                 | VPS35L (1-963, full-length, codon optimized for E. coli expression) in pAV5a vector                               | This study                                                                                                                                                                         | pDB122                                                                                                                         |
| VPS35L point mutants                   | V205D<br>R248M<br>T276W<br>N279L<br>N279W<br>W280Y<br>W280D<br>K283D<br>V205D/R248M                               | This study<br>This study<br>This study<br>This study<br>This study<br>This study<br>This study<br>This study<br>This study                                                         | pDB155<br>pDB156<br>pDB139<br>pDB157<br>pDB138<br>pDB158<br>pDB137<br>pDB159<br>pDB136                                         |
| VPS26C                                 | VPS26C (1-297, full-length) in pAV5a vector                                                                       | Published <sup>5</sup>                                                                                                                                                             | pDB48                                                                                                                          |
| VPS26C point mutant                    | K14E                                                                                                              | This study                                                                                                                                                                         | pDB160                                                                                                                         |
| MBP-VPS26C                             | VPS26C (1-297, full-length, codon-optimized for E. coli expression) in pMalC2Tev vector                           | This study                                                                                                                                                                         | pDB72                                                                                                                          |
| VPS29-His <sub>6</sub>                 | VPS29-Tev-(GGG) <sub>2</sub> -His <sub>6</sub> in pAV5a vector                                                    | Published <sup>5</sup>                                                                                                                                                             | pDB47                                                                                                                          |
| MBP-CCDC22 NN-CH-VBD                   | MBP-Tev-CCDC22 (1-118)-(GGSK) <sub>6</sub> -CCDC22 (436-727) in pMalC2Tev vector                                  | Published <sup>5</sup>                                                                                                                                                             | pDB79                                                                                                                          |
| MBP-CCDC93 VBD                         | MBP-Tev-hCCDC93 (442-631) in pMalC2Tev vector                                                                     | Published <sup>5</sup>                                                                                                                                                             | pDB80                                                                                                                          |
| GST-SNX17                              | GST-Tev-hSNX17 (1-470, full-length) in modified pET vector                                                        | Published <sup>4</sup>                                                                                                                                                             | pDB77                                                                                                                          |
| GST-SNX17 truncations                  | Δ470<br>Δ467-470                                                                                                  | This study<br>This study                                                                                                                                                           | pDB176<br>pDB177                                                                                                               |
| GST-SNX17 CT                           | GST-SNX17 (451-470) in modified pET vector                                                                        | This study                                                                                                                                                                         | pDB169                                                                                                                         |
| GST-SNX17 CT point mutants             | I465L<br>I465V<br>G466A<br>G466R<br>G466L<br>G466E<br>E468A<br>E468R<br>E468L<br>E468G<br>L470V<br>L470I<br>L470G | This study<br>This study | pDB179<br>pDB180<br>pDB181<br>pDB182<br>pDB183<br>pDB184<br>pDB185<br>pDB186<br>pDB187<br>pDB188<br>pDB189<br>pDB190<br>pDB191 |
| GST-SNX31 CT                           | GST-SNX31 (421-440) in pGexTev vector                                                                             | This study                                                                                                                                                                         | pDB170                                                                                                                         |
| GST-LRMDA CT                           | GST-LRMDA (179-198) in pGexTev vector                                                                             | This study                                                                                                                                                                         | pDB171                                                                                                                         |
| GST-TIMM23 CT                          | GST-TIMM23 (190-209) in pGexTev vector                                                                            | This study                                                                                                                                                                         | pDB172                                                                                                                         |
| GST-PATE1 CT                           | GST-PATE1 (107-126) in pGexTev vector                                                                             | This study                                                                                                                                                                         | pDB173                                                                                                                         |
| GST-ARHGEF25 CT                        | GST-ARHGEF25 (561-580) in pGexTev vector                                                                          | This study                                                                                                                                                                         | pDB174                                                                                                                         |

|                                     |                                                 |                                      |                                         |
|-------------------------------------|-------------------------------------------------|--------------------------------------|-----------------------------------------|
| GST-HYOU1 CT                        | GST-HYOU1 (980-999) in pGexTev vector           | This study                           | pDB175                                  |
| <b>Mammalian expression vectors</b> |                                                 |                                      |                                         |
| pEBB                                | Empty vector                                    | Published <sup>2</sup>               | EB006                                   |
| pEBB-VPS35L-2xHA                    | Full length, also referred to as wild-type (WT) | Published <sup>3</sup>               | EB1758                                  |
| pEBB-VPS35L-2xHA point mutations    | N279W<br>W280D<br>V205D/R248M                   | This study                           | EB1919,<br>EB1918,<br>EB1917            |
| pEBB-HA-VPS26C                      | Wild-type (WT)                                  | This study                           | EB1354                                  |
| pLVX                                | Empty vector                                    | Takara                               | EB1611                                  |
| pLVX-VPS35L-2xHA point mutations    | Wild-type (WT)<br>N279W<br>W280D<br>V205D/R248M | Published <sup>3</sup><br>This study | EB1778,<br>EB1925,<br>EB1924,<br>EB1923 |
| pCI2-GFP-FLAG-SNX17                 | Wild-type (WT)                                  | This study                           | EB1915                                  |
| pcDNA 3.1-FLAG-SNX31                | Wild-type (WT)                                  | This study                           | EB1931                                  |

## References

1. Ismail, A.M., Padrick, S.B., Chen, B., Umetani, J. & Rosen, M.K. The WAVE regulatory complex is inhibited. *Nat Struct Mol Biol* **16**, 561-3 (2009).
2. Tanaka, M., Gupta, R. & Mayer, B.J. Differential inhibition of signaling pathways by dominant-negative SH2/SH3 adapter proteins. *Mol Cell Biol* **15**, 6829-37 (1995).
3. McNally, K.E. et al. Retriever is a multiprotein complex for retromer-independent endosomal cargo recycling. *Nat Cell Biol* **19**, 1214-1225 (2017).
4. Stiegler A.L., Zhang R., Liu W., & Boggon T.J. Structural determinants for binding of sorting nexin 17 (SNX17) to the cytoplasmic adaptor protein Krev interaction trapped 1 (KRIT1). *J Biol Chem.* **289**(36), 25362-25373 (2014).
5. Boesch, D. J., Singla, A., Han, Y., Kramer, D. A., Liu, Q., Suzuki, K., Juneja, P., Zhao, X., Long, X., Medlyn, M. J., Billadeau, D. D., Chen, Z., Chen, B., & Burstein, E. Structural organization of the retriever-CCC endosomal recycling complex. *Nature structural & molecular biology* (2023).

## Supplementary Table 2: Sequences of recombinant proteins used in this study.

Only sequences in the final product (i.e., after protease cleavage to remove the affinity tag) are shown and are annotated by corresponding colors.

|                                                                                                                                                                                                                                                                                                                                                                                                                                                                                                                                                                                                                                                                                                                                                                                                                                                                                                                                                                                                                                                                                           |
|-------------------------------------------------------------------------------------------------------------------------------------------------------------------------------------------------------------------------------------------------------------------------------------------------------------------------------------------------------------------------------------------------------------------------------------------------------------------------------------------------------------------------------------------------------------------------------------------------------------------------------------------------------------------------------------------------------------------------------------------------------------------------------------------------------------------------------------------------------------------------------------------------------------------------------------------------------------------------------------------------------------------------------------------------------------------------------------------|
| <p><b>&gt;VPS35L</b><br/>MAVFPWHSRNRNYKAEFASCRLEAVPLEFGDYHPLKPIITVTESKTKKVNKRGSTSTSSSSSSSVVDPLSSVLDGTDPLSMFAATADPAALAAAMDSSRRKRDRDDNSVV<br/>GSDPEPWTNKRGEILARYTTTEKLSINLFMGSEKKGAGTATLAMSEKVRTRLEELDDFEEGSQKELNLTQQDYVNRIEELNQLSKDAWASDQKVKALKIIVIQCSKLLSD<br/>TSVIQFYPSKFLVITDIDLDTFGKLVYERIFSMCVDSRSVLPDHFSPENANDTAKETCLNWFVKIASIRELIPRFYVEASILKCNKFLSKTGISSECLPRLTCMIRIGDPL<br/>VSVYARAYLCRVGMEVAPHLKETLNKNFFDFLLTFKQIHGDTVQNQLVVGQVELPSYLPYPPAMDWIFQCISYHAPEALLTEMERCKKLGNNALLNSVMSAFRAEFI<br/>ATRSMDFIGMIKECDESGFPKHLFRSLGSLNLAALADPPESDRLQILNEAWKVIITKLNPKQDYINCAEVWVEYTCCKHFTKREVNVTADVIVKHMTPDRAFEDSYPQLQLII<br/>KKVIAHFHDFSVLFSVEKFLPFLDMFQKESVSRVEVCKCIMDAFIKHQQEPTKDPVILNALLHVCKTMHDSVNALTLEDEKRMLSYLINGFIKMVSGRDFEQQLSFYVES<br/>RSMFCNLEPVLVQLIHSVNRLAMETRKVMKGNHSRKTAAAFVACVAYCFITIPSLAGIFTRNLNLYLHSGQVALANQCLSQADAFKAAISLVEPVPKMINIDGKMRPSES<br/>FLEFLCNFFSTLLIIVDPHPEHGVFLVRELLNVIQDYTWEDNSDEKIRIYTCVHLHLLSAMSQETYLHYIDKVDSDNSLYGGDSKFLAENNKLCETVMAQILEHLKTLAK<br/>DEALKRQSSLGLSFFNSILAHGDLRNNKLNQLSVNLWHLAQRHGCADTRTMVKTLEYIKKQSKQPDMDTHLTELALRPLQTRT</p>                 |
| <p><b>&gt;VPS35L<sup>V205D</sup></b><br/>MAVFPWHSRNRNYKAEFASCRLEAVPLEFGDYHPLKPIITVTESKTKKVNKRGSTSTSSSSSSSVVDPLSSVLDGTDPLSMFAATADPAALAAAMDSSRRKRDRDDNSVV<br/>GSDPEPWTNKRGEILARYTTTEKLSINLFMGSEKKGAGTATLAMSEKVRTRLEELDDFEEGSQKELNLTQQDYVNRIEELNQLSKDAWASDQKVKALKIIVIQCSKLLSD<br/>TSVIQFYPSKFLVITDIDLDTFGKLVYERIFSMCVDSRSVLPDHFSPENANDTAKETCLNWFVKIASIRELIPRFYVEASILKCNKFLSKTGISSECLPRLTCMIRIGDPL<br/>VSVYARAYLCRVGMEVAPHLKETLNKNFFDFLLTFKQIHGDTVQNQLVVGQVELPSYLPYPPAMDWIFQCISYHAPEALLTEMERCKKLGNNALLNSVMSAFRAEFI<br/>ATRSMDFIGMIKECDESGFPKHLFRSLGSLNLAALADPPESDRLQILNEAWKVIITKLNPKQDYINCAEVWVEYTCCKHFTKREVNVTADVIVKHMTPDRAFEDSYPQLQLII<br/>KKVIAHFHDFSVLFSVEKFLPFLDMFQKESVSRVEVCKCIMDAFIKHQQEPTKDPVILNALLHVCKTMHDSVNALTLEDEKRMLSYLINGFIKMVSGRDFEQQLSFYVES<br/>RSMFCNLEPVLVQLIHSVNRLAMETRKVMKGNHSRKTAAAFVACVAYCFITIPSLAGIFTRNLNLYLHSGQVALANQCLSQADAFKAAISLVEPVPKMINIDGKMRPSES<br/>FLEFLCNFFSTLLIIVDPHPEHGVFLVRELLNVIQDYTWEDNSDEKIRIYTCVHLHLLSAMSQETYLHYIDKVDSDNSLYGGDSKFLAENNKLCETVMAQILEHLKTLAK<br/>DEALKRQSSLGLSFFNSILAHGDLRNNKLNQLSVNLWHLAQRHGCADTRTMVKTLEYIKKQSKQPDMDTHLTELALRPLQTRT</p> |
| <p><b>&gt;VPS35L<sup>R248M</sup></b><br/>MAVFPWHSRNRNYKAEFASCRLEAVPLEFGDYHPLKPIITVTESKTKKVNKRGSTSTSSSSSSSVVDPLSSVLDGTDPLSMFAATADPAALAAAMDSSRRKRDRDDNSVV<br/>GSDPEPWTNKRGEILARYTTTEKLSINLFMGSEKKGAGTATLAMSEKVRTRLEELDDFEEGSQKELNLTQQDYVNRIEELNQLSKDAWASDQKVKALKIIVIQCSKLLSD<br/>TSVIQFYPSKFLVITDIDLDTFGKLVYERIFSMCVDSRSVLPDHFSPENANDTAKETCLNWFVKIASIRELIPRFYVEASILKCNKFLSKTGISSECLPRLTCMIRIGDPL<br/>VSVYARAYLCRVGMEVAPHLKETLNKNFFDFLLTFKQIHGDTVQNQLVVGQVELPSYLPYPPAMDWIFQCISYHAPEALLTEMERCKKLGNNALLNSVMSAFRAEFI<br/>ATRSMDFIGMIKECDESGFPKHLFRSLGSLNLAALADPPESDRLQILNEAWKVIITKLNPKQDYINCAEVWVEYTCCKHFTKREVNVTADVIVKHMTPDRAFEDSYPQLQLII<br/>KKVIAHFHDFSVLFSVEKFLPFLDMFQKESVSRVEVCKCIMDAFIKHQQEPTKDPVILNALLHVCKTMHDSVNALTLEDEKRMLSYLINGFIKMVSGRDFEQQLSFYVES<br/>RSMFCNLEPVLVQLIHSVNRLAMETRKVMKGNHSRKTAAAFVACVAYCFITIPSLAGIFTRNLNLYLHSGQVALANQCLSQADAFKAAISLVEPVPKMINIDGKMRPSES<br/>FLEFLCNFFSTLLIIVDPHPEHGVFLVRELLNVIQDYTWEDNSDEKIRIYTCVHLHLLSAMSQETYLHYIDKVDSDNSLYGGDSKFLAENNKLCETVMAQILEHLKTLAK<br/>DEALKRQSSLGLSFFNSILAHGDLRNNKLNQLSVNLWHLAQRHGCADTRTMVKTLEYIKKQSKQPDMDTHLTELALRPLQTRT</p> |
| <p><b>&gt;VPS35L<sup>R276W</sup></b><br/>MAVFPWHSRNRNYKAEFASCRLEAVPLEFGDYHPLKPIITVTESKTKKVNKRGSTSTSSSSSSSVVDPLSSVLDGTDPLSMFAATADPAALAAAMDSSRRKRDRDDNSVV<br/>GSDPEPWTNKRGEILARYTTTEKLSINLFMGSEKKGAGTATLAMSEKVRTRLEELDDFEEGSQKELNLTQQDYVNRIEELNQLSKDAWASDQKVKALKIIVIQCSKLLSD<br/>TSVIQFYPSKFLVITDIDLDTFGKLVYERIFSMCVDSRSVLPDHFSPENANDTAKETCLNWFVKIASIRELIPRFYVEASILKCNKFLSKTGISSECLPRLTCMIRIGDPL<br/>VSVYARAYLCRVGMEVAPHLKETLNKNFFDFLLTFKQIHGDTVQNQLVVGQVELPSYLPYPPAMDWIFQCISYHAPEALLTEMERCKKLGNNALLNSVMSAFRAEFI<br/>ATRSMDFIGMIKECDESGFPKHLFRSLGSLNLAALADPPESDRLQILNEAWKVIITKLNPKQDYINCAEVWVEYTCCKHFTKREVNVTADVIVKHMTPDRAFEDSYPQLQLII<br/>KKVIAHFHDFSVLFSVEKFLPFLDMFQKESVSRVEVCKCIMDAFIKHQQEPTKDPVILNALLHVCKTMHDSVNALTLEDEKRMLSYLINGFIKMVSGRDFEQQLSFYVES<br/>RSMFCNLEPVLVQLIHSVNRLAMETRKVMKGNHSRKTAAAFVACVAYCFITIPSLAGIFTRNLNLYLHSGQVALANQCLSQADAFKAAISLVEPVPKMINIDGKMRPSES<br/>FLEFLCNFFSTLLIIVDPHPEHGVFLVRELLNVIQDYTWEDNSDEKIRIYTCVHLHLLSAMSQETYLHYIDKVDSDNSLYGGDSKFLAENNKLCETVMAQILEHLKTLAK<br/>DEALKRQSSLGLSFFNSILAHGDLRNNKLNQLSVNLWHLAQRHGCADTRTMVKTLEYIKKQSKQPDMDTHLTELALRPLQTRT</p> |
| <p><b>&gt;VPS35L<sup>R279L</sup></b><br/>MAVFPWHSRNRNYKAEFASCRLEAVPLEFGDYHPLKPIITVTESKTKKVNKRGSTSTSSSSSSSVVDPLSSVLDGTDPLSMFAATADPAALAAAMDSSRRKRDRDDNSVV<br/>GSDPEPWTNKRGEILARYTTTEKLSINLFMGSEKKGAGTATLAMSEKVRTRLEELDDFEEGSQKELNLTQQDYVNRIEELNQLSKDAWASDQKVKALKIIVIQCSKLLSD<br/>TSVIQFYPSKFLVITDIDLDTFGKLVYERIFSMCVDSRSVLPDHFSPENANDTAKETCLNWFVKIASIRELIPRFYVEASILKCNKFLSKTGISSECLPRLTCMIRIGDPL<br/>VSVYARAYLCRVGMEVAPHLKETLNKNFFDFLLTFKQIHGDTVQNQLVVGQVELPSYLPYPPAMDWIFQCISYHAPEALLTEMERCKKLGNNALLNSVMSAFRAEFI<br/>ATRSMDFIGMIKECDESGFPKHLFRSLGSLNLAALADPPESDRLQILNEAWKVIITKLNPKQDYINCAEVWVEYTCCKHFTKREVNVTADVIVKHMTPDRAFEDSYPQLQLII<br/>KKVIAHFHDFSVLFSVEKFLPFLDMFQKESVSRVEVCKCIMDAFIKHQQEPTKDPVILNALLHVCKTMHDSVNALTLEDEKRMLSYLINGFIKMVSGRDFEQQLSFYVES<br/>RSMFCNLEPVLVQLIHSVNRLAMETRKVMKGNHSRKTAAAFVACVAYCFITIPSLAGIFTRNLNLYLHSGQVALANQCLSQADAFKAAISLVEPVPKMINIDGKMRPSES<br/>FLEFLCNFFSTLLIIVDPHPEHGVFLVRELLNVIQDYTWEDNSDEKIRIYTCVHLHLLSAMSQETYLHYIDKVDSDNSLYGGDSKFLAENNKLCETVMAQILEHLKTLAK<br/>DEALKRQSSLGLSFFNSILAHGDLRNNKLNQLSVNLWHLAQRHGCADTRTMVKTLEYIKKQSKQPDMDTHLTELALRPLQTRT</p> |
| <p><b>&gt;VPS35L<sup>R279L</sup></b><br/>MAVFPWHSRNRNYKAEFASCRLEAVPLEFGDYHPLKPIITVTESKTKKVNKRGSTSTSSSSSSSVVDPLSSVLDGTDPLSMFAATADPAALAAAMDSSRRKRDRDDNSVV<br/>GSDPEPWTNKRGEILARYTTTEKLSINLFMGSEKKGAGTATLAMSEKVRTRLEELDDFEEGSQKELNLTQQDYVNRIEELNQLSKDAWASDQKVKALKIIVIQCSKLLSD<br/>TSVIQFYPSKFLVITDIDLDTFGKLVYERIFSMCVDSRSVLPDHFSPENANDTAKETCLNWFVKIASIRELIPRFYVEASILKCNKFLSKTGISSECLPRLTCMIRIGDPL<br/>VSVYARAYLCRVGMEVAPHLKETLNKNFFDFLLTFKQIHGDTVQNQLVVGQVELPSYLPYPPAMDWIFQCISYHAPEALLTEMERCKKLGNNALLNSVMSAFRAEFI<br/>ATRSMDFIGMIKECDESGFPKHLFRSLGSLNLAALADPPESDRLQILNEAWKVIITKLNPKQDYINCAEVWVEYTCCKHFTKREVNVTADVIVKHMTPDRAFEDSYPQLQLII<br/>KKVIAHFHDFSVLFSVEKFLPFLDMFQKESVSRVEVCKCIMDAFIKHQQEPTKDPVILNALLHVCKTMHDSVNALTLEDEKRMLSYLINGFIKMVSGRDFEQQLSFYVES<br/>RSMFCNLEPVLVQLIHSVNRLAMETRKVMKGNHSRKTAAAFVACVAYCFITIPSLAGIFTRNLNLYLHSGQVALANQCLSQADAFKAAISLVEPVPKMINIDGKMRPSES<br/>FLEFLCNFFSTLLIIVDPHPEHGVFLVRELLNVIQDYTWEDNSDEKIRIYTCVHLHLLSAMSQETYLHYIDKVDSDNSLYGGDSKFLAENNKLCETVMAQILEHLKTLAK<br/>DEALKRQSSLGLSFFNSILAHGDLRNNKLNQLSVNLWHLAQRHGCADTRTMVKTLEYIKKQSKQPDMDTHLTELALRPLQTRT</p> |
| <p><b>&gt;VPS35L<sup>R279L</sup></b><br/>MAVFPWHSRNRNYKAEFASCRLEAVPLEFGDYHPLKPIITVTESKTKKVNKRGSTSTSSSSSSSVVDPLSSVLDGTDPLSMFAATADPAALAAAMDSSRRKRDRDDNSVV<br/>GSDPEPWTNKRGEILARYTTTEKLSINLFMGSEKKGAGTATLAMSEKVRTRLEELDDFEEGSQKELNLTQQDYVNRIEELNQLSKDAWASDQKVKALKIIVIQCSKLLSD<br/>TSVIQFYPSKFLVITDIDLDTFGKLVYERIFSMCVDSRSVLPDHFSPENANDTAKETCLNWFVKIASIRELIPRFYVEASILKCNKFLSKTGISSECLPRLTCMIRIGDPL<br/>VSVYARAYLCRVGMEVAPHLKETLNKNFFDFLLTFKQIHGDTVQNQLVVGQVELPSYLPYPPAMDWIFQCISYHAPEALLTEMERCKKLGNNALLNSVMSAFRAEFI<br/>ATRSMDFIGMIKECDESGFPKHLFRSLGSLNLAALADPPESDRLQILNEAWKVIITKLNPKQDYINCAEVWVEYTCCKHFTKREVNVTADVIVKHMTPDRAFEDSYPQLQLII<br/>KKVIAHFHDFSVLFSVEKFLPFLDMFQKESVSRVEVCKCIMDAFIKHQQEPTKDPVILNALLHVCKTMHDSVNALTLEDEKRMLSYLINGFIKMVSGRDFEQQLSFYVES<br/>RSMFCNLEPVLVQLIHSVNRLAMETRKVMKGNHSRKTAAAFVACVAYCFITIPSLAGIFTRNLNLYLHSGQVALANQCLSQADAFKAAISLVEPVPKMINIDGKMRPSES<br/>FLEFLCNFFSTLLIIVDPHPEHGVFLVRELLNVIQDYTWEDNSDEKIRIYTCVHLHLLSAMSQETYLHYIDKVDSDNSLYGGDSKFLAENNKLCETVMAQILEHLKTLAK<br/>DEALKRQSSLGLSFFNSILAHGDLRNNKLNQLSVNLWHLAQRHGCADTRTMVKTLEYIKKQSKQPDMDTHLTELALRPLQTRT</p> |
| <p><b>&gt;VPS35L<sup>R280Y</sup></b><br/>MAVFPWHSRNRNYKAEFASCRLEAVPLEFGDYHPLKPIITVTESKTKKVNKRGSTSTSSSSSSSVVDPLSSVLDGTDPLSMFAATADPAALAAAMDSSRRKRDRDDNSVV<br/>GSDPEPWTNKRGEILARYTTTEKLSINLFMGSEKKGAGTATLAMSEKVRTRLEELDDFEEGSQKELNLTQQDYVNRIEELNQLSKDAWASDQKVKALKIIVIQCSKLLSD<br/>TSVIQFYPSKFLVITDIDLDTFGKLVYERIFSMCVDSRSVLPDHFSPENANDTAKETCLNWFVKIASIRELIPRFYVEASILKCNKFLSKTGISSECLPRLTCMIRIGDPL<br/>VSVYARAYLCRVGMEVAPHLKETLNKNFFDFLLTFKQIHGDTVQNQLVVGQVELPSYLPYPPAMDWIFQCISYHAPEALLTEMERCKKLGNNALLNSVMSAFRAEFI<br/>ATRSMDFIGMIKECDESGFPKHLFRSLGSLNLAALADPPESDRLQILNEAWKVIITKLNPKQDYINCAEVWVEYTCCKHFTKREVNVTADVIVKHMTPDRAFEDSYPQLQLII<br/>KKVIAHFHDFSVLFSVEKFLPFLDMFQKESVSRVEVCKCIMDAFIKHQQEPTKDPVILNALLHVCKTMHDSVNALTLEDEKRMLSYLINGFIKMVSGRDFEQQLSFYVES<br/>RSMFCNLEPVLVQLIHSVNRLAMETRKVMKGNHSRKTAAAFVACVAYCFITIPSLAGIFTRNLNLYLHSGQVALANQCLSQADAFKAAISLVEPVPKMINIDGKMRPSES<br/>FLEFLCNFFSTLLIIVDPHPEHGVFLVRELLNVIQDYTWEDNSDEKIRIYTCVHLHLLSAMSQETYLHYIDKVDSDNSLYGGDSKFLAENNKLCETVMAQILEHLKTLAK<br/>DEALKRQSSLGLSFFNSILAHGDLRNNKLNQLSVNLWHLAQRHGCADTRTMVKTLEYIKKQSKQPDMDTHLTELALRPLQTRT</p> |
| <p><b>&gt;VPS35L<sup>R280D</sup></b><br/>MAVFPWHSRNRNYKAEFASCRLEAVPLEFGDYHPLKPIITVTESKTKKVNKRGSTSTSSSSSSSVVDPLSSVLDGTDPLSMFAATADPAALAAAMDSSRRKRDRDDNSVV<br/>GSDPEPWTNKRGEILARYTTTEKLSINLFMGSEKKGAGTATLAMSEKVRTRLEELDDFEEGSQKELNLTQQDYVNRIEELNQLSKDAWASDQKVKALKIIVIQCSKLLSD<br/>TSVIQFYPSKFLVITDIDLDTFGKLVYERIFSMCVDSRSVLPDHFSPENANDTAKETCLNWFVKIASIRELIPRFYVEASILKCNKFLSKTGISSECLPRLTCMIRIGDPL<br/>VSVYARAYLCRVGMEVAPHLKETLNKNFFDFLLTFKQIHGDTVQNQLVVGQVELPSYLPYPPAMDWIFQCISYHAPEALLTEMERCKKLGNNALLNSVMSAFRAEFI<br/>ATRSMDFIGMIKECDESGFPKHLFRSLGSLNLAALADPPESDRLQILNEAWKVIITKLNPKQDYINCAEVWVEYTCCKHFTKREVNVTADVIVKHMTPDRAFEDSYPQLQLII<br/>KKVIAHFHDFSVLFSVEKFLPFLDMFQKESVSRVEVCKCIMDAFIKHQQEPTKDPVILNALLHVCKTMHDSVNALTLEDEKRMLSYLINGFIKMVSGRDFEQQLSFYVES<br/>RSMFCNLEPVLVQLIHSVNRLAMETRKVMKGNHSRKTAAAFVACVAYCFITIPSLAGIFTRNLNLYLHSGQVALANQCLSQADAFKAAISLVEPVPKMINIDGKMRPSES<br/>FLEFLCNFFSTLLIIVDPHPEHGVFLVRELLNVIQDYTWEDNSDEKIRIYTCVHLHLLSAMSQETYLHYIDKVDSDNSLYGGDSKFLAENNKLCETVMAQILEHLKTLAK<br/>DEALKRQSSLGLSFFNSILAHGDLRNNKLNQLSVNLWHLAQRHGCADTRTMVKTLEYIKKQSKQPDMDTHLTELALRPLQTRT</p> |

MAVFPWHSRNRNYKAEFASCRLEAVPLEFGDYHPLKPIITVTESKTKKVNKRGSTSSSTSSSSSSSVVDPLSSVLDGTDPLSMFAATADPAALAAAMDSSRRKRDRDDNSVV  
GSDFEPTWTKRGEILARYTTTEKLSINLFMGSEKKGAGTATLAMSEKVRTRLEELDDFEEGSQKELNLTQQDYVNRIBELNQLSKDAWASDQKVKALKIIVIQCSKLLSD  
TSVIQFYPSKFLVITDIDLDTFGKLVYERIFSMCVDSRSVLPDHFSPENANDTAKETCLNDFDKIASIRELIPRFYVEASILKCNKFLSKTGISSECLPRLTCMIRGIGDPL  
VSVYARAYLCRVGMEVAPHLKEITLNKNFFDFLLTFKQIHGDTVQNQLVQVGVLEPSYLYPLYPAMDWIFQCISYHAPAEALLTEMERCKKLGNNALLNSVMSAFRAEFI  
ATRSMDFIGMIKECEDSEGFPHKLLFRSLGNLALADPPESDRLIQILNEAWKVIITKLNPKQDYINCAEVWVEYTCCKHFTKREVTVLADVIKHMTPDRAFEDSYQQLI  
KVKVIAHFHDFSVLFSVEKFLPFLDMFQKESVSRVEVCKCIMDAFIKHQEQPTKDPVILNALLHVCKTMHDSVNALTEDEKRMLSYLINGFIKMSVFGRDFEQQLSIFYVES  
RSMFCNLEFVVLQIHSVNRLAMETRVKMGKNSRKTAAVFRACVAYCFITIPSLAGIFTRNLNLYLHSGQVALANQCLSQADAFKAAISLVPEVPKMINIDGKMRPSES  
FLEFLCNFFSTLLIVDPHPEHGVFLVRELLNVIQDYTWEDNSDEKIRIYTCVHLHLSAMSQETYLHYIDKVDNSDLSYGGDSKFLAENNKLCETVMAQILEHLKTLAK  
DEALKRQSSGLSFFNSILAHGDLRNNKLNQLSVNLWHLAQRHGACADTRTMVKTLEYIKKQSKQPDMDTHLTELALRPLQTRT

**>VPS35T<sup>R283D</sup>**  
MAVFPWHSRNRNYKAEFASCRLEAVPLEFGDYHPLKPIITVTESKTKKVNKRGSTSSSTSSSSSSSVVDPLSSVLDGTDPLSMFAATADPAALAAAMDSSRRKRDRDDNSVV  
GSDFEPTWTKRGEILARYTTTEKLSINLFMGSEKKGAGTATLAMSEKVRTRLEELDDFEEGSQKELNLTQQDYVNRIBELNQLSKDAWASDQKVKALKIIVIQCSKLLSD  
TSVIQFYPSKFLVITDIDLDTFGKLVYERIFSMCVDSRSVLPDHFSPENANDTAKETCLNWFDFDIASIRELIPRFYVEASILKCNKFLSKTGISSECLPRLTCMIRGIGDPL  
VSVYARAYLCRVGMEVAPHLKEITLNKNFFDFLLTFKQIHGDTVQNQLVQVGVLEPSYLYPLYPAMDWIFQCISYHAPAEALLTEMERCKKLGNNALLNSVMSAFRAEFI  
ATRSMDFIGMIKECEDSEGFPHKLLFRSLGNLALADPPESDRLIQILNEAWKVIITKLNPKQDYINCAEVWVEYTCCKHFTKREVTVLADVIKHMTPDRAFEDSYQQLI  
KVKVIAHFHDFSVLFSVEKFLPFLDMFQKESVSRVEVCKCIMDAFIKHQEQPTKDPVILNALLHVCKTMHDSVNALTEDEKRMLSYLINGFIKMSVFGRDFEQQLSIFYVES  
RSMFCNLEFVVLQIHSVNRLAMETRVKMGKNSRKTAAVFRACVAYCFITIPSLAGIFTRNLNLYLHSGQVALANQCLSQADAFKAAISLVPEVPKMINIDGKMRPSES  
FLEFLCNFFSTLLIVDPHPEHGVFLVRELLNVIQDYTWEDNSDEKIRIYTCVHLHLSAMSQETYLHYIDKVDNSDLSYGGDSKFLAENNKLCETVMAQILEHLKTLAK  
DEALKRQSSGLSFFNSILAHGDLRNNKLNQLSVNLWHLAQRHGACADTRTMVKTLEYIKKQSKQPDMDTHLTELALRPLQTRT

**>VPS35T<sup>V205D/R248M</sup>**  
MAVFPWHSRNRNYKAEFASCRLEAVPLEFGDYHPLKPIITVTESKTKKVNKRGSTSSSTSSSSSSSVVDPLSSVLDGTDPLSMFAATADPAALAAAMDSSRRKRDRDDNSVV  
GSDFEPTWTKRGEILARYTTTEKLSINLFMGSEKKGAGTATLAMSEKVRTRLEELDDFEEGSQKELNLTQQDYVNRIBELNQLSKDAWASDQKVKALKIIVIQCSKLLSD  
TSVIQFYPSKFLVITDIDLDTFGKLVYERIFSMCVDSRSVLPDHFSPENANDTAKETCLNWFDFDIASIRELIPRFYVEASILKCNKFLSKTGISSECLPRLTCMIRGIGDPL  
VSVYARAYLCRVGMEVAPHLKEITLNKNFFDFLLTFKQIHGDTVQNQLVQVGVLEPSYLYPLYPAMDWIFQCISYHAPAEALLTEMERCKKLGNNALLNSVMSAFRAEFI  
ATRSMDFIGMIKECEDSEGFPHKLLFRSLGNLALADPPESDRLIQILNEAWKVIITKLNPKQDYINCAEVWVEYTCCKHFTKREVTVLADVIKHMTPDRAFEDSYQQLI  
KVKVIAHFHDFSVLFSVEKFLPFLDMFQKESVSRVEVCKCIMDAFIKHQEQPTKDPVILNALLHVCKTMHDSVNALTEDEKRMLSYLINGFIKMSVFGRDFEQQLSIFYVES  
RSMFCNLEFVVLQIHSVNRLAMETRVKMGKNSRKTAAVFRACVAYCFITIPSLAGIFTRNLNLYLHSGQVALANQCLSQADAFKAAISLVPEVPKMINIDGKMRPSES  
FLEFLCNFFSTLLIVDPHPEHGVFLVRELLNVIQDYTWEDNSDEKIRIYTCVHLHLSAMSQETYLHYIDKVDNSDLSYGGDSKFLAENNKLCETVMAQILEHLKTLAK  
DEALKRQSSGLSFFNSILAHGDLRNNKLNQLSVNLWHLAQRHGACADTRTMVKTLEYIKKQSKQPDMDTHLTELALRPLQTRT

**>VPS26C**  
MGTALDIKIKRANKVYHAGEVLSGVVVISKSDSVQHGVSLTMEGTVNQLSASVGVFEAFYNSVKPIQIINSTIEMVKPGKFPSPGKTEIPFEFPLHLKGNKVLVYETIYH  
GVFVNIQYTLRCDMKRSLAKDLTKTCEFIHVSAPQKGFPTSPVDFTTIPETLQNVKERALLPKFLLRGLHNSVNCVITQPLTGELVVSSEAAIRSVLQVLRVETCG  
CAEGYARDATEIQNIQIADGDVCRGLSVPIYVMVPRFLTCPTLETTNFKVEFEVNIIVLLHPDHLITENFPLKLCRI

**>VPS26C<sup>R14E</sup>**  
MGTALDIKIKRANKVYHAGEVLSGVVVISKSDSVQHGVSLTMEGTVNQLSASVGVFEAFYNSVKPIQIINSTIEMVKPGKFPSPGKTEIPFEFPLHLKGNKVLVYETIYH  
GVFVNIQYTLRCDMKRSLAKDLTKTCEFIHVSAPQKGFPTSPVDFTTIPETLQNVKERALLPKFLLRGLHNSVNCVITQPLTGELVVSSEAAIRSVLQVLRVETCG  
CAEGYARDATEIQNIQIADGDVCRGLSVPIYVMVPRFLTCPTLETTNFKVEFEVNIIVLLHPDHLITENFPLKLCRI

**>MBP-*Tev*-VPS26C**  
MKIEEGKLVIIWINGDKYNGLAEVGKKEFKDGTGIKVTVEHPDKLEEKFPQVAATGDGDPDIIFWAHDRFGGYAQSGLLAEITPDKAFQDKLYPFTWDAVRYNGKLIAYPIA  
VEALSIIYNKDLLPNPPKTWEEIPALDKELKARAGKSAIMFNLEQPYFTWPLIAADGGYAFKYENGYDIKDVGVNAGAKAGLTFVLVLIKNKHMNADTDSYIAEAAFNK  
GETAMTINGPWAWSNIDTSKVNIGVTVLPTFKGQPSKPFVGVLSAGINAASPNKELAKEFLENYLLTDEGLEAVNKDKPLGAVALKSVEEELAKDPRIATMENAQKGEI  
MPNIPQMSAFWYAVRTAVINAASGRQTVDEALKDAQNTSSNNNNNNNNNNGIETRISSEFENLYFQGHMGTALDIKIKRANKVYHAGEVLSGVVVISKSDSVQHGVSL  
TMEGTVNQLSASVGVFEAFYNSVKPIQIINSTIEMVKPGKFPSPGKTEIPFEFPLHLKGNKVLVYETIYHGVFVNIQYTLRCDMKRSLAKDLTKTCEFIHVSAPQKGF  
PSVDFTTIPETLQNVKERALLPKFLLRGLHNSVNCVITQPLTGELVVSSEAAIRSVLQVLRVETCGCAEGYARDATEIQNIQIADGDVCRGLSVPIYVMVPRFLTCPT  
LETTNFKVEFEVNIIVLLHPDHLITENFPLKLCRI

**>VPS29-*Tev*-(GGS)<sub>2</sub>-His<sub>6</sub>** (corresponding to Q9UBQ0-2, isoform 2 in Uniprot)  
MAGHRLVVLVLDLHIHRCNSLPKFKKLLVPGKIQHILCTGNLCTKESYDYLKTLAGDVHIVRGDFDENLNYPEQKVTVGQFKIGLIHGQVPIWGDMSLALLQRQF  
DVIDLISGTHKFEAFEHENKFIYINPGSATGAYNALETNIIPSFVLMIDIQASTVVTVYVYQLIGDDVKVERIEYKKNPENLYFQGGSGGSHHHHHH

**>MBP-*Tev*-CCDC22 NN-CH (1-118) - (GSK)<sub>6</sub>-CCDC22 VBD (436-727)**  
MKIEEGKLVIIWINGDKYNGLAEVGKKEFKDGTGIKVTVEHPDKLEEKFPQVAATGDGDPDIIFWAHDRFGGYAQSGLLAEITPDKAFQDKLYPFTWDAVRYNGKLIAYPIA  
VEALSIIYNKDLLPNPPKTWEEIPALDKELKARAGKSAIMFNLEQPYFTWPLIAADGGYAFKYENGYDIKDVGVNAGAKAGLTFVLVLIKNKHMNADTDSYIAEAAFNK  
GETAMTINGPWAWSNIDTSKVNIGVTVLPTFKGQPSKPFVGVLSAGINAASPNKELAKEFLENYLLTDEGLEAVNKDKPLGAVALKSVEEELAKDPRIATMENAQKGEI  
MPNIPQMSAFWYAVRTAVINAASGRQTVDEALKDAQNTSSNNNNNNNNNNGIETRISSEFENLYFQGHMGTALDIKIKRANKVYHAGEVLSGVVVISKSDSVQHGVSL  
LRVINPAGVSGLSPLPLAMSAARFLAMSLAQACMDLGYPLELQNGYFLYSEPLDLRLLDGLFLAERLPTDASEDADQGGSKGSGKSGKSGKSGKSKRKLQDCRCL  
ESSRRLAEIQELHQSVRAAAEAEARKEVEYKQMLSELETLPDVRSLAYTQRILDEIVGNIRKQKEITKILSDTKELQKEINSLSGKLDTRFAVTDLVFQKAKKDDAVR  
KAYKYLAALHENCSQLIQTIEDTGTIMREVRDLBEEQIETELGKKTLSNLEKIREDYRALRQENAGLLGRVREA

**>MBP-*Tev*-CCDC93 VBD (442-631)**  
MKIEEGKLVIIWINGDKYNGLAEVGKKEFKDGTGIKVTVEHPDKLEEKFPQVAATGDGDPDIIFWAHDRFGGYAQSGLLAEITPDKAFQDKLYPFTWDAVRYNGKLIAYPIA  
VEALSIIYNKDLLPNPPKTWEEIPALDKELKARAGKSAIMFNLEQPYFTWPLIAADGGYAFKYENGYDIKDVGVNAGAKAGLTFVLVLIKNKHMNADTDSYIAEAAFNK  
GETAMTINGPWAWSNIDTSKVNIGVTVLPTFKGQPSKPFVGVLSAGINAASPNKELAKEFLENYLLTDEGLEAVNKDKPLGAVALKSVEEELAKDPRIATMENAQKGEI  
MPNIPQMSAFWYAVRTAVINAASGRQTVDEALKDAQNTSSNNNNNNNNNNGIETRISSEFENLYFQGHMGTALDIKIKRANKVYHAGEVLSGVVVISKSDSVQHGVSL  
RRKIDEVPSRAELIQYKRFIELYRQISAVHKETKQFPTLYNTLDDKKVYLEKEISLNSIHENFSQAMASPAARDQFLRQMEQIVEGIKQSRMKMEKKKQENKMRDQL  
NDQYLELLEKQRLYFKTKFEKKEENMMLLSKVKAKAS

**>GST-*Tev*-SNX17**  
MSPILGYWKIKGLVQPTLRLLEYLEEKYEEHLRDEGDKWRNKKFELGLEFPNLPYYIDGDVKLTQSMAIRYIADKHNLGGCPKERAESMLEGAVLDIRYGVSRIA  
YSKDFETLKVDFLSKPLPEMLKMFEDRLCHKTYLNGDHTHPDFMLYDALDVVLYMDPMLDAPFKLVCFKRIEAIPIQIDKYLKSSKYIAWPLQGWQATFGGGDHPKAS  
LVPRSENLYFQGSMMHFSIPETESRSGDSGSAVYAINIHVNGVHLCRVRSYQLLGLHQBKEYGANVLPAPFPKFLSLTPAEVEQRRELEKYMQAVRQDPLLSSET  
FNSFLRRAQQETQVPTTEVSLEVLNNGQKVLVNVLTSDQTEDVLEVAAKLDDPDLIGYFSLFLVREKEDGAFSFRKQLQEFELPYVSVTSLRSQYKIVLRKSYWD  
SAYDDVDMENRVGLNLLYAQTVSDIERGWILVTKQHRQLKSLQEKVSKKEFLRLAQTLRHGYLRFDACVADFPEKDCPVVVSAGNSELSQLRPLGQQLREGSFRVTR  
MRCWRVTSVPLPSGSTSSPGRGRGEVRELEFAEYLSKDRQLQVWITSQPAIMMSICLQSMVDELMMVKKSGSIRKMLRRRVGGTLRRSDSQAVKSPPLLESPTATRE  
SMVKLSKLSAVSLRIGSPSTDASADVHGNFAFEGIGDEDL

**>GST-*Tev*-SNX17 Δ470 (1-469)**  
MSPILGYWKIKGLVQPTLRLLEYLEEKYEEHLRDEGDKWRNKKFELGLEFPNLPYYIDGDVKLTQSMAIRYIADKHNLGGCPKERAESMLEGAVLDIRYGVSRIA  
YSKDFETLKVDFLSKPLPEMLKMFEDRLCHKTYLNGDHTHPDFMLYDALDVVLYMDPMLDAPFKLVCFKRIEAIPIQIDKYLKSSKYIAWPLQGWQATFGGGDHPKAS  
LVPRSENLYFQGSMMHFSIPETESRSGDSGSAVYAINIHVNGVHLCRVRSYQLLGLHQBKEYGANVLPAPFPKFLSLTPAEVEQRRELEKYMQAVRQDPLLSSET  
FNSFLRRAQQETQVPTTEVSLEVLNNGQKVLVNVLTSDQTEDVLEVAAKLDDPDLIGYFSLFLVREKEDGAFSFRKQLQEFELPYVSVTSLRSQYKIVLRKSYWD  
SAYDDVDMENRVGLNLLYAQTVSDIERGWILVTKQHRQLKSLQEKVSKKEFLRLAQTLRHGYLRFDACVADFPEKDCPVVVSAGNSELSQLRPLGQQLREGSFRVTR

|                                                                                                                                                                                                                                                                                                                                |
|--------------------------------------------------------------------------------------------------------------------------------------------------------------------------------------------------------------------------------------------------------------------------------------------------------------------------------|
| MRCWRVTSVPLPSGSTSSPGRGRGEVRLLEAFEYLSMCKDRLOQVVTITSPQAIMMSICLQSMVDELVMVKKSGGSIKMLRRRVGGTLRRSDSQAVKSPPLLESPDATRE<br>SMVKLSSKLSAVSLRGIGSPSTASASDVHGNFAFEGIGDED                                                                                                                                                                    |
| >GST- <i>Tev</i> -SNX17 Δ467-470 (1-466)<br>MSPILGYWKIKGLVQPTRLLEYLEEKYEEHLERDEGDKWRNKKFELGLEFPNLPYYIDGDVKLTQSMAIIRYIADKHNMLGGCPKERAEISMLEGAVLDIRYGVSR<br>IAYSKDFETLKVDFLSKLEPEMLKMFEDRLCHKTYLNGDHVTHPDMFLYDALDVVLYMDPMCLDAFPKLVCFKKRIEAIPIQIDKYLKSSKYIAWPLQGWQATF<br>GGGDHPPKASLVPRSENLYFQGSMSASDVHGNFAFEGIGDEDL              |
| >GST- <i>Tev</i> -SNX17 CT (451-470) <sup>E465L</sup><br>MSPILGYWKIKGLVQPTRLLEYLEEKYEEHLERDEGDKWRNKKFELGLEFPNLPYYIDGDVKLTQSMAIIRYIADKHNMLGGCPKERAEISMLEGAVLDIRYGVSR<br>IAYSKDFETLKVDFLSKLEPEMLKMFEDRLCHKTYLNGDHVTHPDMFLYDALDVVLYMDPMCLDAFPKLVCFKKRIEAIPIQIDKYLKSSKYIAWPLQGWQATF<br>GGGDHPPKASLVPRSENLYFQGSMSASDVHGNFAFEGIGDEDL |
| >GST- <i>Tev</i> -SNX17 CT (451-470) <sup>E465V</sup><br>MSPILGYWKIKGLVQPTRLLEYLEEKYEEHLERDEGDKWRNKKFELGLEFPNLPYYIDGDVKLTQSMAIIRYIADKHNMLGGCPKERAEISMLEGAVLDIRYGVSR<br>IAYSKDFETLKVDFLSKLEPEMLKMFEDRLCHKTYLNGDHVTHPDMFLYDALDVVLYMDPMCLDAFPKLVCFKKRIEAIPIQIDKYLKSSKYIAWPLQGWQATF<br>GGGDHPPKASLVPRSENLYFQGSMSASDVHGNFAFEGIGDEDL |
| >GST- <i>Tev</i> -SNX17 CT (451-470) <sup>E466A</sup><br>MSPILGYWKIKGLVQPTRLLEYLEEKYEEHLERDEGDKWRNKKFELGLEFPNLPYYIDGDVKLTQSMAIIRYIADKHNMLGGCPKERAEISMLEGAVLDIRYGVSR<br>IAYSKDFETLKVDFLSKLEPEMLKMFEDRLCHKTYLNGDHVTHPDMFLYDALDVVLYMDPMCLDAFPKLVCFKKRIEAIPIQIDKYLKSSKYIAWPLQGWQATF<br>GGGDHPPKASLVPRSENLYFQGSMSASDVHGNFAFEGIGDEDL |
| >GST- <i>Tev</i> -SNX17 CT (451-470) <sup>E466R</sup><br>MSPILGYWKIKGLVQPTRLLEYLEEKYEEHLERDEGDKWRNKKFELGLEFPNLPYYIDGDVKLTQSMAIIRYIADKHNMLGGCPKERAEISMLEGAVLDIRYGVSR<br>IAYSKDFETLKVDFLSKLEPEMLKMFEDRLCHKTYLNGDHVTHPDMFLYDALDVVLYMDPMCLDAFPKLVCFKKRIEAIPIQIDKYLKSSKYIAWPLQGWQATF<br>GGGDHPPKASLVPRSENLYFQGSMSASDVHGNFAFEGIGDEDL |
| >GST- <i>Tev</i> -SNX17 CT (451-470) <sup>E466L</sup><br>MSPILGYWKIKGLVQPTRLLEYLEEKYEEHLERDEGDKWRNKKFELGLEFPNLPYYIDGDVKLTQSMAIIRYIADKHNMLGGCPKERAEISMLEGAVLDIRYGVSR<br>IAYSKDFETLKVDFLSKLEPEMLKMFEDRLCHKTYLNGDHVTHPDMFLYDALDVVLYMDPMCLDAFPKLVCFKKRIEAIPIQIDKYLKSSKYIAWPLQGWQATF<br>GGGDHPPKASLVPRSENLYFQGSMSASDVHGNFAFEGIGDEDL |
| >GST- <i>Tev</i> -SNX17 CT (451-470) <sup>E466E</sup><br>MSPILGYWKIKGLVQPTRLLEYLEEKYEEHLERDEGDKWRNKKFELGLEFPNLPYYIDGDVKLTQSMAIIRYIADKHNMLGGCPKERAEISMLEGAVLDIRYGVSR<br>IAYSKDFETLKVDFLSKLEPEMLKMFEDRLCHKTYLNGDHVTHPDMFLYDALDVVLYMDPMCLDAFPKLVCFKKRIEAIPIQIDKYLKSSKYIAWPLQGWQATF<br>GGGDHPPKASLVPRSENLYFQGSMSASDVHGNFAFEGIGDEDL |
| >GST- <i>Tev</i> -SNX17 CT (451-470) <sup>E468A</sup><br>MSPILGYWKIKGLVQPTRLLEYLEEKYEEHLERDEGDKWRNKKFELGLEFPNLPYYIDGDVKLTQSMAIIRYIADKHNMLGGCPKERAEISMLEGAVLDIRYGVSR<br>IAYSKDFETLKVDFLSKLEPEMLKMFEDRLCHKTYLNGDHVTHPDMFLYDALDVVLYMDPMCLDAFPKLVCFKKRIEAIPIQIDKYLKSSKYIAWPLQGWQATF<br>GGGDHPPKASLVPRSENLYFQGSMSASDVHGNFAFEGIGDEDL |
| >GST- <i>Tev</i> -SNX17 CT (451-470) <sup>E468R</sup><br>MSPILGYWKIKGLVQPTRLLEYLEEKYEEHLERDEGDKWRNKKFELGLEFPNLPYYIDGDVKLTQSMAIIRYIADKHNMLGGCPKERAEISMLEGAVLDIRYGVSR<br>IAYSKDFETLKVDFLSKLEPEMLKMFEDRLCHKTYLNGDHVTHPDMFLYDALDVVLYMDPMCLDAFPKLVCFKKRIEAIPIQIDKYLKSSKYIAWPLQGWQATF<br>GGGDHPPKASLVPRSENLYFQGSMSASDVHGNFAFEGIGDEDL |
| >GST- <i>Tev</i> -SNX17 CT (451-470) <sup>E468L</sup><br>MSPILGYWKIKGLVQPTRLLEYLEEKYEEHLERDEGDKWRNKKFELGLEFPNLPYYIDGDVKLTQSMAIIRYIADKHNMLGGCPKERAEISMLEGAVLDIRYGVSR<br>IAYSKDFETLKVDFLSKLEPEMLKMFEDRLCHKTYLNGDHVTHPDMFLYDALDVVLYMDPMCLDAFPKLVCFKKRIEAIPIQIDKYLKSSKYIAWPLQGWQATF<br>GGGDHPPKASLVPRSENLYFQGSMSASDVHGNFAFEGIGDEDL |
| >GST- <i>Tev</i> -SNX17 CT (451-470) <sup>E468G</sup><br>MSPILGYWKIKGLVQPTRLLEYLEEKYEEHLERDEGDKWRNKKFELGLEFPNLPYYIDGDVKLTQSMAIIRYIADKHNMLGGCPKERAEISMLEGAVLDIRYGVSR<br>IAYSKDFETLKVDFLSKLEPEMLKMFEDRLCHKTYLNGDHVTHPDMFLYDALDVVLYMDPMCLDAFPKLVCFKKRIEAIPIQIDKYLKSSKYIAWPLQGWQATF<br>GGGDHPPKASLVPRSENLYFQGSMSASDVHGNFAFEGIGDEDL |
| >GST- <i>Tev</i> -SNX17 CT (451-470) <sup>L470V</sup><br>MSPILGYWKIKGLVQPTRLLEYLEEKYEEHLERDEGDKWRNKKFELGLEFPNLPYYIDGDVKLTQSMAIIRYIADKHNMLGGCPKERAEISMLEGAVLDIRYGVSR<br>IAYSKDFETLKVDFLSKLEPEMLKMFEDRLCHKTYLNGDHVTHPDMFLYDALDVVLYMDPMCLDAFPKLVCFKKRIEAIPIQIDKYLKSSKYIAWPLQGWQATF<br>GGGDHPPKASLVPRSENLYFQGSMSASDVHGNFAFEGIGDEDV |
| >GST- <i>Tev</i> -SNX17 CT (451-470) <sup>L470I</sup><br>MSPILGYWKIKGLVQPTRLLEYLEEKYEEHLERDEGDKWRNKKFELGLEFPNLPYYIDGDVKLTQSMAIIRYIADKHNMLGGCPKERAEISMLEGAVLDIRYGVSR<br>IAYSKDFETLKVDFLSKLEPEMLKMFEDRLCHKTYLNGDHVTHPDMFLYDALDVVLYMDPMCLDAFPKLVCFKKRIEAIPIQIDKYLKSSKYIAWPLQGWQATF<br>GGGDHPPKASLVPRSENLYFQGSMSASDVHGNFAFEGIGDEDI |
| >GST- <i>Tev</i> -SNX17 CT (451-470) <sup>L470G</sup><br>MSPILGYWKIKGLVQPTRLLEYLEEKYEEHLERDEGDKWRNKKFELGLEFPNLPYYIDGDVKLTQSMAIIRYIADKHNMLGGCPKERAEISMLEGAVLDIRYGVSR<br>IAYSKDFETLKVDFLSKLEPEMLKMFEDRLCHKTYLNGDHVTHPDMFLYDALDVVLYMDPMCLDAFPKLVCFKKRIEAIPIQIDKYLKSSKYIAWPLQGWQATF<br>GGGDHPPKASLVPRSENLYFQGSMSASDVHGNFAFEGIGDEDG |
| >GST- <i>Tev</i> -SNX31 CT (421-440)<br>MSPILGYWKIKGLVQPTRLLEYLEEKYEEHLERDEGDKWRNKKFELGLEFPNLPYYIDGDVKLTQSMAIIRYIADKHNMLGGCPKERAEISMLEGAVLDIRYGVSR<br>IAYSKDFETLKVDFLSKLEPEMLKMFEDRLCHKTYLNGDHVTHPDMFLYDALDVVLYMDPMCLDAFPKLVCFKKRIEAIPIQIDKYLKSSKYIAWPLQGWQATF<br>GGGDHPPKASLVPRSENLYFQGHMSKIKIAKDDCVFNGIKEEDL                 |
| >GST- <i>Tev</i> -LRMDA CT (179-198)<br>MSPILGYWKIKGLVQPTRLLEYLEEKYEEHLERDEGDKWRNKKFELGLEFPNLPYYIDGDVKLTQSMAIIRYIADKHNMLGGCPKERAEISMLEGAVLDIRYGVSR<br>IAYSKDFETLKVDFLSKLEPEMLKMFEDRLCHKTYLNGDHVTHPDMFLYDALDVVLYMDPMCLDAFPKLVCFKKRIEAIPIQIDKYLKSSKYIAWPLQGWQATF<br>GGGDHPPKASLVPRSENLYFQGHMRYVYVYKNSSEGNRIFIRDQL                |
| >GST- <i>Tev</i> -TIMM23 CT (190-209)<br>MSPILGYWKIKGLVQPTRLLEYLEEKYEEHLERDEGDKWRNKKFELGLEFPNLPYYIDGDVKLTQSMAIIRYIADKHNMLGGCPKERAEISMLEGAVLDIRYGVSR<br>IAYSKDFETLKVDFLSKLEPEMLKMFEDRLCHKTYLNGDHVTHPDMFLYDALDVVLYMDPMCLDAFPKLVCFKKRIEAIPIQIDKYLKSSKYIAWPLQGWQATF<br>GGGDHPPKASLVPRSENLYFQGHMRYVYVYKNSSEGNRIFIRDQL               |

>GST-Tev-PATE1 CT (107-126)

MSPILGYWKIKGLVQPTRLLEYLEEKYEEHLYERDEGDKWRNKKFELGLEFPNLPYYIDGDVKLTQSMAIIRYIADKHNMLGGCPKERAEISMLEGAVLDIRYGVSRIA  
YSKDFETLKVDFLSKLP EMLKMFEDRLCHKTYLNGDHVTHPDFMLYDALDVVLYMDPMCLDAFPKLVCFKKRIEAIPIQIDKYLKSSKYIAWPLQGWQATFGGGDHPPKSD  
LVPRGSENLYFQGHMSVYLVNFRCCRS HDLCNEDEL

>GST-Tev-ARHGEF25 CT (561-580)

MSPILGYWKIKGLVQPTRLLEYLEEKYEEHLYERDEGDKWRNKKFELGLEFPNLPYYIDGDVKLTQSMAIIRYIADKHNMLGGCPKERAEISMLEGAVLDIRYGVSRIA  
YSKDFETLKVDFLSKLP EMLKMFEDRLCHKTYLNGDHVTHPDFMLYDALDVVLYMDPMCLDAFPKLVCFKKRIEAIPIQIDKYLKSSKYIAWPLQGWQATFGGGDHPPKSD  
LVPRGSENLYFQGHMPTPKTPPCQARLAKLDEDEL

>GST-Tev-HYOU1 CT (980-999)

MSPILGYWKIKGLVQPTRLLEYLEEKYEEHLYERDEGDKWRNKKFELGLEFPNLPYYIDGDVKLTQSMAIIRYIADKHNMLGGCPKERAEISMLEGAVLDIRYGVSRIA  
YSKDFETLKVDFLSKLP EMLKMFEDRLCHKTYLNGDHVTHPDFMLYDALDVVLYMDPMCLDAFPKLVCFKKRIEAIPIQIDKYLKSSKYIAWPLQGWQATFGGGDHPPKSD  
LVPRGSENLYFQGHMEPEQKEQSTGQKRPLKNEDEL



**Supplementary Table 3: DNA oligos used in this study.**

| Purpose                                        | Identifier and sequence, all 5' to 3'                                                                                                                                                                                                                                                                                                                                                                                                                 |
|------------------------------------------------|-------------------------------------------------------------------------------------------------------------------------------------------------------------------------------------------------------------------------------------------------------------------------------------------------------------------------------------------------------------------------------------------------------------------------------------------------------|
| VPS35L                                         | GAACTCCTAAAAACCGCCACC<br>oDB220120-14, GGTGGCGGTTTTTAGGAGTTC, reverse primer to open pAV5a<br>oDB220120-15, TAATCTAGAGCCTGCAGTCTCGAG, forward primer to open pAV5a<br>cbyo-230217-3, CTCGGTCCGAACCTCTAAAAAACCGCCACCATGGCAGTTTTTCCGTGGCATAG, SLIC<br>VPS35Lopti into untagged pAV5a fw<br>CGCTGCAGACCCGTACCTAATCTAGAGCCTGCAGTCTCGAGGCATGC<br>cbyo-230217-4, GCATGCCTCGAGACTGCAGGCTCTAGATTAGGTACGGGTCTGCAGCG, SLIC<br>VPS35Lopti into untagged pAV5a bw |
| VPS35L <sup>V205D</sup>                        | djbo230823-1, ATAAAGCACTGAAAATTGTGATCCAGTG, Aliblunt for VPS35L V205D FW<br>CATGGGCAAGCGATCAGAAAG<br>djbo230823-2, CTTTCTGATCGCTTGCCCATG, Aliblunt for VPS35L V205D BW                                                                                                                                                                                                                                                                                |
| VPS35L <sup>R248M</sup>                        | djbo230823-3, ATGATTTTTCATGTGTGTGATAGCCGTAG, Aliblunt for VPS35L R248M<br>FW<br>GGATACCTTTGGTAAACTGGTGTATGAA<br>djbo230823-4, TTCATACACAGTTTACCAAAGGTATCC, Aliblunt for VPS35L R248M BW                                                                                                                                                                                                                                                               |
| VPS35L <sup>T276W</sup>                        | Cbyo-230927-5, TGGTGTCTGAACTGGTTTTTCAAATTTGCCAG, Aliblunt for VPS35Lopti<br>T276W fw<br>GGAAAATGCAAATGATACCGCCAAAGAA<br>Cbyo-230927-6, TTCTTTGGCGGTATCATTTCATTTTCC, Aliblunt for VPS35Lopti T276W<br>bw                                                                                                                                                                                                                                               |
| VPS35L <sup>N279L</sup>                        | djbo230823-5, CTGTGGTTTTTCAAATTTGCCAGCATTC, Aliblunt for VPS35L N279L FW<br>GATACCGCCAAAGAAACCTGTCTG<br>djbo230823-6, CAGACAGGTTTCTTTGGCGGTATC, Aliblunt for VPS35L N279L BW                                                                                                                                                                                                                                                                          |
| VPS35L <sup>N279W</sup>                        | Cbyo-230927-3, TGGTGGTTTTTCAAATTTGCCAGCATTCG, Aliblunt for VPS35Lopti N279W<br>fw<br>GATACCGCCAAAGAAACCTGTCTG<br>Cbyo-230927-4, CAGACAGGTTTCTTTGGCGGTATC, Aliblunt for VPS35Lopti N279W bw                                                                                                                                                                                                                                                            |
| VPS35L <sup>W280Y</sup>                        | djbo230823-7, ATTTTTCCTAAAATTTGCCAGCATTCGTG, Aliblunt for VPS35L W280Y FW<br>GATACCGCCAAAGAAACCTGTCTGAACT<br>djbo230823-8, AGTTCAGACAGGTTTCTTTGGCGGTATC, Aliblunt for VPS35L W280Y BW                                                                                                                                                                                                                                                                 |
| VPS35L <sup>W280D</sup>                        | Cbyo-230927-1, GATTTTTTCAAATTTGCCAGCATTCGTGAAC, Aliblunt for VPS35Lopti<br>W280D fw<br>GATACCGCCAAAGAAACCTGTCTGAACT<br>Cbyo-230927-2, GTTCAGACAGGTTTCTTTGGCGGTATC, Aliblunt for VPS35Lopti W280D<br>bw                                                                                                                                                                                                                                                |
| VPS35L <sup>K283D</sup>                        | djbo230823-9, GATATTGCCAGCATTCGTGAACCTG, Aliblunt for VPS35L K283D FW<br>CAAAGAAACCTGTCTGAACTGGTTTTTC<br>djbo230823-10, GAAAACAGGTTTCAGACAGGTTTCTTTG, Aliblunt for VPS35L K283D BW                                                                                                                                                                                                                                                                    |
| VPS26C <sup>K14E</sup>                         | djbo230824-1, GAAGTTTATCACGCCGGGAAGTG, Aliblunt for VPS26C K14E FW<br>CCTGGACATCAAGATTAAGAGCGAAT<br>djbo230824-2, ATTCGCTCTTTTAACTCTGATGTCCAGG, Aliblunt for VPS26C K14E BW                                                                                                                                                                                                                                                                           |
| MBP-Tev-VPS26C                                 | oDB220725-3, ATATTACATATGGGCACCGCACTGGATATC, Forward primer to add NdeI to<br>VPS26Copti geneblock<br>GCTGAAACTGTGCCGCAATTAAGGATCCTAATAA<br>oDB220725-4, TTATTAGGATCCTTAAATGGGCACAGTTTCAGC, Reverse primer to add<br>BamHI to VPS26Copti geneblock                                                                                                                                                                                                    |
| GST-Tev-SNX17 Δ470<br>(1-469)                  | >djbo230715-1, taaCTCGAGCACCACCACCAC, forward primer to truncate SNX17 L470<br>cgagggcattggagatgaggat<br>>djbo230715-2, atcctcatctccaatgcccctcg, reverse primer to truncate SNX17<br>L470                                                                                                                                                                                                                                                             |
| GST-Tev-SNX17 Δ467-<br>470 (1-466)             | >djbo230715-1, taaCTCGAGCACCACCACCAC, forward primer to truncate SNX17 467-<br>470<br>caatttcgccttcgagggcattgga<br>>djbo230715-3, tccaatgccctcgaaggcgaaattg, backward primer to truncate SNX17<br>467-470                                                                                                                                                                                                                                             |
| GST-Tev-SNX17 CT<br>(451-470)                  | >djbo230715-4, gccagtgccagtgatgtccac, forward primer to truncate 1-450<br>GATCTGAAAACCTGTATTTTCAGGGATCCatg<br>>djbo230715-5, catGGATCCCTGAAAATACAGGTTTTCAGATC, reverse primer to truncate<br>1-450                                                                                                                                                                                                                                                    |
| GST-Tev-SNX17 CT<br>(451-470) <sup>I465L</sup> | >djbo-240209-1, CTGGGAGATGAGGATCTGTA <sup>I</sup> ACTCGAGC, FW primer to make I465L<br>CAATTTCCGCTTCGAGGGC<br>>djbo240209-2, GCCCTCGAAGGCGAAATTG, RV primer to make I465L                                                                                                                                                                                                                                                                             |
| GST-Tev-SNX17 CT<br>(451-470) <sup>I465V</sup> | >djbo-240209-3, GTGGGAGATGAGGATCTGTA <sup>I</sup> ACTCGAGC, FW primer to make I465V<br>>use djbo240209-2 as RV primer                                                                                                                                                                                                                                                                                                                                 |
| GST-Tev-SNX17 CT<br>(451-470) <sup>S466A</sup> | >djbo-240209-4, GCCGATGAGGATCTGTA <sup>I</sup> ACTCGAGCACC, FW primer to make G466A<br>CAATTTCCGCTTCGAGGGCATT<br>>djbo240209-5, AATGCCCTCGAAGGCGAAATTG, RV primer to make G466A                                                                                                                                                                                                                                                                       |
| GST-Tev-SNX17 CT<br>(451-470) <sup>G466R</sup> | >djbo240209-6, CTGATGAGGATCTGTA <sup>I</sup> ACTCGAGCACC, FW primer to make G466R<br>>use djbo240209-5 as RV primer                                                                                                                                                                                                                                                                                                                                   |
| GST-Tev-SNX17 CT<br>(451-470) <sup>G466L</sup> | >djbo240209-7, CTGGATGAGGATCTGTA <sup>I</sup> ACTCGAGCACC, FW primer to make G466L<br>>use djbo240209-5 as RV primer                                                                                                                                                                                                                                                                                                                                  |
| GST-Tev-SNX17 CT<br>(451-470) <sup>S466E</sup> | >djbo240209-8, GAGGATGAGGATCTGTA <sup>I</sup> ACTCGAGCACC, FW primer to make G466E<br>>use djbo240209-5 as RV primer                                                                                                                                                                                                                                                                                                                                  |

|                                             |                                                                                                                                                                                                                                                                                                                        |
|---------------------------------------------|------------------------------------------------------------------------------------------------------------------------------------------------------------------------------------------------------------------------------------------------------------------------------------------------------------------------|
| GST-Tev-SNX17 CT (451-470) <sup>E468A</sup> | >djbo240209-9, GCCGATCTGTA <del>ACT</del> CTCGAGCACCACC, FW primer to make E468A<br>CCTTCGAGGGCATTGGAGAT<br>>djbo240209-10, ATCTCCAATGCCCTCGAAGG, RV primer to make E468A                                                                                                                                              |
| GST-Tev-SNX17 CT (451-470) <sup>E468R</sup> | >djbo240209-11, CGTGATCTGTA <del>ACT</del> CTCGAGCACCACC, FW primer to make E468R<br>>use djbo240209-10 as RV primer                                                                                                                                                                                                   |
| GST-Tev-SNX17 CT (451-470) <sup>E468L</sup> | >djbo240209-12, CTGGATCTGTA <del>ACT</del> CTCGAGCACCACC, FW primer to make E468L<br>>use djbo240209-10 as RV primer                                                                                                                                                                                                   |
| GST-Tev-SNX17 CT (451-470) <sup>E468G</sup> | >djbo240209-13, GCGGATCTGTA <del>ACT</del> CTCGAGCACCACC, FW primer to make E468G<br>>use djbo240209-10 as RV primer                                                                                                                                                                                                   |
| GST-Tev-SNX17 CT (451-470) <sup>L470V</sup> | >djbo240209-14, GTGTA <del>ACT</del> CTCGAGCACCACCAC, FW primer to make L470V<br>GAGGGCATTGGAGATGAGGAT<br>>djbo240209-15, ATCCTCATCTCCAATGCCCTC, RV primer to make L470V                                                                                                                                               |
| GST-Tev-SNX17 CT (451-470) <sup>L470I</sup> | >djbo240209-16, ATTTA <del>ACT</del> CTCGAGCACCACCACC, FW primer to make L470I<br>>use djbo240209-15 as RV primer                                                                                                                                                                                                      |
| GST-Tev-SNX17 CT (451-470) <sup>L470G</sup> | >djbo230715-1, GGctaaCTCGAGCACCACCACCAC, forward primer to mutate SNX17<br>L470G<br>cttcgagggcattggagatgaggat<br>>djbo230715-2, atcctcatctccaatgccctcgaag, reverse primer to mutate SNX17<br>L470G                                                                                                                     |
| GST-Tev-SNX31 CT (421-440)                  | >djbo240131-1, GTTTTCGGTAACATCAAAGAGGAGGACCTTTAAATCGTGACTGACTGACGATCTGC, FW<br>primer to aliblunt SNX31 tail into pGex<br>CtgaaaaacctgtattttcagggccatagAGCAAGATTTAAATTCGAAAGGATGACTGT<br>>djbo240131-2, ACAGTCATCCTTTGCAATTTAATCTTGCTcatatggcctgaaatacaggttttcaG,<br>RV primer to aliblunt SNX31 tail into pGex        |
| GST-Tev-LRMDA CT (179-198)                  | >djbo240131-3, GGTAATCGTTTTATCCGTGACGATCAATTATAAATCGTGACTGACTGACGATCTGC, FW<br>primer to aliblunt LRMDA tail into pGex<br>CtgaaaaacctgtattttcagggccatagCGCTACGTGTACTACGGCAAAAATAGTGAA<br>>djbo240131-4, TTCACTATTTTTGCCGTAGTACACGTAGCGcatatggcctgaaatacaggttttcaG,<br>RV primer to aliblunt LRMDA tail into pGex       |
| GST-Tev-TIMM23 CT (190-209)                 | >djbo240131-5, ATGAAAGGGTCTCTGTTACAACAGAGCTGTAAATCGTGACTGACTGACGATCTGC, FW<br>primer to aliblunt TIMM23 tail into pGex<br>CtgaaaaacctgtattttcagggccatagTTGTACGCGCTGTACAATAATTGGGAGCAT<br>>djbo240131-6, ATGCTCCCAATTATTGTACAGCGCGTACAacatagggcctgaaatacaggttttcaG,<br>RV primer to aliblunt TIMM23 tail into pGex      |
| GST-Tev-PATE1 CT (107-126)                  | >djbo240131-7, CGTTCGCACGATCTTTGCAACGAGGACCTTTAAATCGTGACTGACTGACGATCTGC, FW<br>primer to aliblunt PATE1 tail into pGex<br>CtgaaaaacctgtattttcagggccatagTCGGTATATTTAGTGAATTTTCGTTGCTGT<br>>djbo240131-8, ACAGCAACGAAAATTCCTAATAATACCGAacatagggcctgaaatacaggttttcaG,<br>RV primer to aliblunt PATE1 tail into pGex       |
| GST-Tev-ARHGEF25 CT (561-580)               | >djbo240131-9, CGCTGGCGAAACTTGATGAAGATGAGCTGTAAATCGTGACTGACTGACGATCTGC, FW<br>primer to aliblunt ARHGEF25 tail into pGex<br>CtgaaaaacctgtattttcagggccatagCCGACCCCAAACTCCGCCATGCCAGGCC<br>>djbo240131-10,<br>GGCCTGGCATGGCGGAGTTTTGGGGTTCGcatatggcctgaaatacaggttttcaG, RV primer to<br>aliblunt ARHGEF25 tail into pGex |
| GST-Tev-HYOU1 CT (980-999)                  | >djbo240131-11, CAGAAGCGCCCTGAAAAATGATGAGTTATAAATCGTGACTGACTGACGATCTGC,<br>FW primer to aliblunt HYOU1 tail into pGex<br>CtgaaaaacctgtattttcagggccatagGAGCCGAGCAAAAGGAGCAATCCACGGGC<br>>djbo240131-12,<br>GCCCCGTGGATTGCTCCTTTTGCTCGGGCTCcatatggcctgaaatacaggttttcaG, RV primer to<br>aliblunt HYOU1 tail into pGex    |



**Supplementary Table 4: Antibodies used in this study.**

| <b>Primary antibodies</b>                                              |                                            |                                                  |                               |                                                                  |
|------------------------------------------------------------------------|--------------------------------------------|--------------------------------------------------|-------------------------------|------------------------------------------------------------------|
| WB, western blot; IF, immunofluorescence staining; FC, Flow Cytometry. |                                            |                                                  |                               |                                                                  |
| <b>Target</b>                                                          | <b>Source (host species)</b>               | <b>Catalog, Clone (References)</b>               | <b>Application (dilution)</b> | <b>Validation information</b>                                    |
| CCDC22                                                                 | ProteinTech Group (rabbit)                 | 16636-1-AP                                       | WB (1:1000)                   | Phillips-Krawczak et al., 2015 <sup>4</sup>                      |
| CCDC93                                                                 | ProteinTech Group (rabbit)                 | 20861-1-AP                                       | WB (1:1000)                   | Phillips-Krawczak et al., 2015 <sup>4</sup>                      |
| COMMD1                                                                 | ProteinTech Group (rabbit)                 | 11938-1-AP                                       | WB (1:1000)                   | Manufacturer validation using various tissues and IF             |
| DENND10                                                                | Custom made, Cocalico Biologicals (rabbit) | 95-110 (Singla et al., 2019 <sup>6</sup> )       | WB (1:500)                    | Singla et al., 2019 <sup>6</sup>                                 |
| FAM21                                                                  | Custom made, Cocalico Biologicals (rabbit) | MC2188 (Gomez and Billadeau, 2009 <sup>7</sup> ) | IF (1:1000)                   | Gomez and Billadeau, 2009 <sup>7</sup>                           |
| FLAG                                                                   | Sigma (mouse)                              | F1804, M2                                        | WB (1:500)                    | Manufacturer validation with overexpressed proteins              |
| HA                                                                     | Biolegend (mouse)                          | 901502, 16B12                                    | WB (1:500), IF (1:100)        | Manufacturer validation with overexpressed proteins              |
| HA                                                                     | Cell Signaling (mouse)                     | 2999S, 6E2                                       | WB (1:1000)                   | Manufacturer validation with overexpressed proteins              |
| Integrin- $\alpha$ 5                                                   | BD Biosciences (mouse)                     | 555615, IIA1                                     | IF (1:100)                    | Manufacturer validation in FACS using isotype control            |
| Integrin- $\beta$ 1                                                    | Santa Cruz (mouse)                         | sc-53711, TS2/16                                 | IF (1:100)                    | Manufacturer validation in FACS using isotype control            |
| LRMDA                                                                  | Abcam (rabbit)                             | 150986                                           | WB (1:500)                    | Manufacturer validation with overexpressed proteins              |
| TIMM23                                                                 | Proteintech Group (rabbit)                 | 11123-1-AP                                       | WB (1:500)                    | Manufacturer validation with immunoprecipitation                 |
| VPS26C                                                                 | Millipore (rabbit)                         | ABN87                                            | WB (1:5000)                   | Singla et al., 2019 <sup>6</sup>                                 |
| VPS29                                                                  | GeneTex (rabbit)                           | GTX104768                                        | WB (1:500)                    | Singla et al., 2019 <sup>6</sup>                                 |
| <b>Secondary antibodies used for immunofluorescence</b>                |                                            |                                                  |                               |                                                                  |
| <b>Fluorophore</b>                                                     | <b>Source (target species)</b>             | <b>Catalog number (dilution)</b>                 |                               | <b>Validation</b>                                                |
| Alexa 488                                                              | Invitrogen (mouse)                         | A11029 (1:500)                                   |                               | Manufacturer validation in IF using no primary antibody controls |
| Alexa 555                                                              | Invitrogen (rabbit)                        | A21428 (1:500)                                   |                               |                                                                  |

**References:**

1. Ismail, A.M., Padrick, S.B., Chen, B., Umetani, J. & Rosen, M.K. The WAVE regulatory complex is inhibited. *Nat Struct Mol Biol* **16**, 561-3 (2009).
2. Tanaka, M., Gupta, R. & Mayer, B.J. Differential inhibition of signaling pathways by dominant-negative SH2/SH3 adapter proteins. *Mol Cell Biol* **15**, 6829-37 (1995).

3. Boesch, D.J. et al. Structural organization of the retriever-CCC endosomal recycling complex. *Nat Struct Mol Biol* (2023).
4. Phillips-Krawczak, C.A. et al. COMMD1 is linked to the WASH complex and regulates endosomal trafficking of the copper transporter ATP7A. *Mol Biol Cell* **26**, 91-103 (2015).
5. Burstein, E. et al. COMMD proteins: A novel family of structural and functional homologs of MURR1. *J Biol Chem* **280**, 22222-22232 (2005).
6. Singla, A. et al. Endosomal PI(3)P regulation by the COMMD/CCDC22/CCDC93 (CCC) complex controls membrane protein recycling. *Nat Commun* **10**, 4271 (2019).
7. Gomez, T.S. & Billadeau, D.D. A FAM21-containing WASH complex regulates retromer-dependent sorting. *Dev Cell* **17**, 699-711 (2009).
